# Supplementary material for: The important role of the location of the alkoxy group on the thiophene ring in designing efficient organic nonlinear optical materials based on double-donor chromophores
Source: Royal Society of Chemistry journal article supplement (doi:10.1039/c5tc00241a), 2015-01-01
Supplement: c5tc00241a1.pdf [file c5tc00241a1.pdf]

## Supporting Information

### The Important Role of the Location of Alkoxy Group on the Thiophene Ring in Designing Efficient Organic Nonlinear Optical Materials Based on Double-Donor Chromophores

Yuhui Yang <sup>ab</sup>, Jialei Liu <sup>a</sup>, Maolin Zhang <sup>ab</sup>, Fenggang Liu <sup>ab</sup>, Haoran Wang <sup>ab</sup>, Shuhui Bo <sup>\*a</sup>,  
Zhen Zhen <sup>a</sup>, Ling Qiu <sup>a</sup>, Xinhou Liu <sup>\*a</sup>

#### 1. poling detailed parameters

Table 1 Contact poling parameters and EO coefficients ( $r_{33}$ ).

| y1 chromophore<br>(wt%) | $T_g$ (°C) <sup>a</sup> | $T_p$ (°C) <sup>b</sup> | Time(min) <sup>c</sup> | $r_{33}$ (pm/V) <sup>d</sup> |
|-------------------------|-------------------------|-------------------------|------------------------|------------------------------|
| 10                      | 149                     | 144                     | 10                     | 54                           |
| 15                      | 146                     | 141                     | 10                     | 82                           |
| 20                      | 138                     | 133                     | 10                     | 128                          |
| 25                      | 134                     | 129                     | 10                     | 159                          |
| y2 chromophore<br>(wt%) |                         |                         |                        |                              |
| 10                      | 148                     | 143                     | 10                     | 41                           |
| 15                      | 144                     | 139                     | 10                     | 62                           |
| 20                      | 137                     | 132                     | 10                     | 90                           |
| 25                      | 130                     | 125                     | 10                     | 102                          |

<sup>a</sup> Glass transition temperature ( $T_g$ ) was measured by DSC with a heating rate of 10°C/min in nitrogen.

<sup>b</sup> Poling temperature.

<sup>c</sup> Poling time.

<sup>d</sup> pm/V, electro-optic coefficients, measured by simple-reflection technique at 1310 nm.

Table2 Corona poling parameters and EO coefficients ( $r_{33}$ ).

| $\gamma$ 1chromophore<br>(wt%)  | $T_g$ ( $^{\circ}$ C) <sup>a</sup> | $T_p$ ( $^{\circ}$ C) <sup>b</sup> | $V_p$ (kV) <sup>c</sup> | Time(min) <sup>d</sup> | $r_{33}$ (pm/V) <sup>e</sup> |
|---------------------------------|------------------------------------|------------------------------------|-------------------------|------------------------|------------------------------|
| 10                              | 149                                | 159                                | 11                      | 10                     | 57                           |
| 15                              | 146                                | 156                                | 11                      | 10                     | 85                           |
| 20                              | 138                                | 148                                | 11                      | 10                     | 132                          |
| 25                              | 134                                | 144                                | 11                      | 10                     | 163                          |
| <hr/>                           |                                    |                                    |                         |                        |                              |
| $\gamma$ 2 chromophore<br>(wt%) |                                    |                                    |                         |                        |                              |
| 10                              | 148                                | 158                                | 11                      | 10                     | 43                           |
| 15                              | 144                                | 154                                | 11                      | 10                     | 63                           |
| 20                              | 137                                | 147                                | 11                      | 10                     | 94                           |
| 25                              | 130                                | 140                                | 11                      | 10                     | 105                          |

<sup>a</sup> Glass transition temperature ( $T_g$ ) was measured by DSC with a heating rate of 10 $^{\circ}$ C/min in nitrogen.

<sup>b</sup> Poling temperature.

<sup>c</sup> Poling voltage.

<sup>d</sup> Poling time.

<sup>e</sup> pm/V, electro-optic coefficients, measured by simple-reflection technique at 1310 nm.

## 2. $r_{33}$ Measurement

The  $r_{33}$  values were measured using the Teng-Man simple reflection technique at the wavelength of 1310 nm using a carefully selected thin ITO electrode with low reflectivity and good transparency in order to minimize the contribution from the multiple reflections. <sup>1</sup> Teng-Man reflection method provides us with a reasonable estimate of the EO performance when performed very carefully. However, some drawbacks of this method are pointed out both from practical and intrinsic viewpoints in many papers. So in table 3 we described the sample structures including ITO, EO film, and glass substrate thicknesses in detail to obtain the accurate results.<sup>2-4</sup> We have measured the standard samples LiNbO<sub>3</sub> to confirm the accuracy of our results and the error bar in using the measurement system is 10%. <sup>5</sup>

Table 3 the detailed parameter of the  $r_{33}$  measurements

| n   | $d_{\text{ITO}}(\text{nm})$ | $d_{\text{film}}(\mu\text{m})$ | $d_{\text{glass}}(\text{mm})$ | Angle of incidence. |
|-----|-----------------------------|--------------------------------|-------------------------------|---------------------|
| 1.5 | 40                          | 2-3                            | 3                             | 45°                 |

### 3. Reference

1. C. C. Teng and H. T. Man, *Appl. Phys. Lett.*, 1990, **56**, 1734.
2. D. H. Park, C. H. Lee and W. N. Herman, *Opt. Express*, 2006, **14**, 8866-8884.
3. C. Greenlee, A. Guilmo, A. Opadeyi, R. Himmelhuber, R. A. Norwood, M. Fallahi, J. Luo, S. Huang, X.-H. Zhou, A. K.-Y. Jen and N. Peyghambarian, *Appl. Phys. Lett.*, 2010, **97**, 041109.
4. T. Yamada and A. Otomo, *Opt. Express*, 2013, **21**, 29240-29248.
5. Y. Shuto and M. Amano, *J. Appl. Phys.*, 1995, **77**, 4632-4638.
